# Supplementary material
Source: Springer Nature journal article supplement (https://www.springermedizin.de/resource/supplementary/12885_2011_2894_MOESM2_ESM.PDF/9462188)
Supplement: MOESM2 [file 9462188]

## Additional file 2

### *2D-nanoLC-MS/MS analysis*

In the first dimension peptides were separated on a strong cation-exchange (SCX) column (35 × 0.3 mm ZORBAX SCX Bioseries II, Agilent technologies) with mobile phase A (water with 3% acetonitrile and 0.1% formic acid) and B (0.5 M ammonium formate, 3% acetonitrile pH set to 3.5 using formic acid) using the capillary pump. The flow was set to 10 µl/min. The sample was eluted in 9 steps; 1% B, 1-6% B, 6-6.5% B, 6.5-10% B, 10-12.5% B, 12.5-15% B, 15-22% B, 22-30% B and 30-80% B (thus yielding a total of 9 fractions). The eluted peptides were trapped on a C<sub>18</sub> trap column (5 µm 5×0.3 mm, ZORBAX; Agilent Technologies), the valve was then switched so that the nanoflow path was redirected through the trap-column and then onto a C<sub>18</sub> analysis column (3.5 µm 150 mm × 100 µm, ZORBAX; Agilent Technologies). The mobile phases of the nanopump were A: water and B: acetonitrile both acidified with 0.1% formic acid. In each run a gradient from 5-40% B for 85 min, from 40-70% B in 5 min and then back to 5% B was applied in a flow rate of 400 nl/min.

Information dependent acquisitions (IDA) were performed with a total cycle time of 9 s including a TOF MS survey scan (1 s,  $m/z$  300-1100), followed by acquiring of MS/MS spectra (2 s,  $m/z$  100-2000) of the 4 most intense ions with charge state 2 to 5. Former target ions were excluded for 50 s and IDA were collected for 120 min for each fraction. The instrument was calibrated with CsI ( $m/z$  132.9054) and the pentapeptide iPDI ( $m/z$  829.5398).
